# Supplementary material for: Association of cumulative average NHHR with benign prostatic hyperplasia incidence in middle-aged and older adults: a prospective nationwide cohort study in China
Source: Research Square preprint supplement (doi:10.21203/rs.3.rs-8213261/v1), 2025-12-01
Supplement: Supplementary file 1 [file 17150e9fbe62d164ad7c6b8d.docx]

**Association between cumulative average NHHR and BPH incidence with follow-up extended to 2018.**

|  | Model1 | P value | Model2 | P value | Model3 | P value |
| --- | --- | --- | --- | --- | --- | --- |
| Cumulative Average NHHR | 1.12 (1.04 ~ 1.21) | ＜0.001 | 1.13 (1.05 ~ 1.22) | 0.001 | 1.11 (1.02 ~ 1.20) | 0.012 |
