# Supplementary material for: Association of cumulative average NHHR with benign prostatic hyperplasia incidence in middle-aged and older adults: a prospective nationwide cohort study in China
Source: Research Square preprint supplement (doi:10.21203/rs.3.rs-8213261/v1), 2025-12-01
Supplement: Supplementary file 2 [file 46938adc224a09cf772448e3.docx]

**Effect values of multiple imputation models**

|  | Model1 | P value | Model2 | P value | Model3 | P value |
| --- | --- | --- | --- | --- | --- | --- |
| Cumulative Average NHHR | 1.11 (1.03 ~ 1.21) | 0.008 | 1.12 (1.04 ~ 1.22) | 0.005 | 1.12 (1.03 ~ 1.22) | 0.008 |
