# Supplementary material for: Association of cumulative average NHHR with benign prostatic hyperplasia incidence in middle-aged and older adults: a prospective nationwide cohort study in China
Source: Research Square preprint supplement (doi:10.21203/rs.3.rs-8213261/v1), 2025-12-01
Supplement: Supplementary file 3 [file cf55b6e4e5b13970128e3aee.docx]

**Association between cumulative average NHHR and BPH after excluding participants with NHHR < 1st percentile or > 99th percentile.**

|  | Model1 | P value | Model2 | P value | Model3 | P value |
| --- | --- | --- | --- | --- | --- | --- |
| Cumulative Average NHHR | 1.27 (1.11 ~ 1.46) | ＜0.001 | 1.26 (1.10 ~ 1.46) | 0.001 | 1.27 (1.10 ~ 1.47) | 0.001 |
