# Supplementary material for: Association of cumulative average NHHR with benign prostatic hyperplasia incidence in middle-aged and older adults: a prospective nationwide cohort study in China
Source: Research Square preprint supplement (doi:10.21203/rs.3.rs-8213261/v1), 2025-12-01
Supplement: Supplementary file 4 [file fcdc39ff307ed92bb84b7e14.docx]

| **Vif** | | | | |
| --- | --- | --- | --- | --- |
| **NHHR：1.080** | **Residence：1.087** | **Drinking status：1.040** | **Smoking stats： 1.034** | **Hypertension： 1.059** |
| **Diabetes：1.042** | **Marital status： 1.040** | **Education：1.110** | **Age： 1.129** | **BMI ：1.011** |
